# Supplementary material
Source: MDPI journal article supplement (https://www.mdpi.com/2075-163X/9/10/642)
Supplement: s1 [file s1]

Archive with 2 entries (2 files):
- minerals-592247-For XML supplementary table captions.pdf
- minerals-592247-For XML tables.xlsx
