# Supplementary material
Source: MDPI journal article supplement (https://www.mdpi.com/2075-163X/9/10/642)
Supplement: s1 [file s1 › minerals-592247-For XML supplementary table captions.pdf]

## SUPPLEMENTARY MATERIAL—TABLE CAPTIONS

**Table S1.** Information on sampling sites.

**Table S2.** Bulk-sample and multiple-window petrographic data on sediment samples from the Bengal delta, estuary, and shelf. Q = quartz (Qp = polycrystalline); F = feldspars (K = K-feldspar; P = plagioclase); L = aphanitic lithic grains (Lv = volcanic and subvolcanic; Lvf = felsic volcanic; Lvm = mafic and intermediate volcanic; Ls = sedimentary; Lcc = limestone; Lcd = dolostone; Lh = chert; Lp = pelite; Lm = metamorphic; Lms = low-rank metasedimentary; Lmv = low-rank metavolcanic; Lmf = high-rank metapelite, metapsammite, and metafelsite; Lmb = high-rank metabasite; Lu = ultramafic). Rock fragments: I = plutonic (Im = mafic plutonic); V = volcanic (Vm = mafic volcanic); C = carbonate (Cd = dolostone); M = metamorphic (Mb = metabasite); S = ultramafic (Sc = cellular serpentinite); n.d. = not determined. The Metamorphic Indices MI and MI\* express the average metamorphic rank of rock fragments in each sample. MI varies from 0 (detritus shed by exclusively sedimentary and volcanic cover rocks) to 500 (very-high-rank detritus shed by exclusively high-grade basement rocks). MI\* considers only metamorphic rock fragments, and thus varies from 100 (very-low-rank detritus shed by exclusively very low-grade metamorphic rocks) to 500 ([3]).

**Table S3.** Bulk-sample and multiple-window heavy-mineral data on sediment samples from the Bengal delta, estuary, and shelf. GSZ = grain size; HMC = heavy mineral concentration; tHMC = transparent heavy mineral concentration; n.d. = not determined. The ZTR index (sum of zircon, tourmaline and rutile over total transparent heavy minerals; [5]) evaluates the ‘chemical durability’ of the detrital assemblage. The HCI (Hornblende Colour Index) and MMI (Metasedimentary Minerals Index) vary from 0 in detritus from greenschist-facies to lowermost amphibolite-facies rocks yielding blue-green amphibole and chloritoid, to 100 in detritus from granulite-facies rocks yielding brown hornblende and sillimanite, and are used to estimate the average metamorphic grade of metagneous and metasedimentary source rocks, respectively. The SI (Sillimanite Index) index varies from 0 in detritus from upper amphibolite-facies metasediments yielding fibrolitic sillimanite to 100 in detritus from granulite-facies metasediments yielding prismatic sillimanite ([4]; [1]).

**Table S4.** Bulk-sample and multiple-window chemical data on sediment samples from the Bengal estuary and shelf. Major and trace element concentrations mostly measured at CRPG-Nancy by ICP-AES and ICP-MS after alkaline fusion with lithium metaborate followed by acid digestion (for full information on analytical procedures and geostandards used see [2]). Analytical uncertainties for major and trace elements are indicated in the tables below.

The 63–2000  $\mu\text{m}$  fraction of Padma sample S3562 (representing 99.6% of the bulk sample) and three subclasses split by sieving at 0.50  $\Phi$  intervals were analysed at Bureau Veritas (ACME Lab, Vancouver, Canada) following a lithium metaborate/tetraborate fusion and nitric acid digestion; major oxides and several minor elements were determined by ICP-ES and trace elements by ICP-MS (for further information on adopted procedures, geostandards used, and precision for various elements of group 4A–4B see <http://acmelab.com>).

REE data were normalized to CI carbonaceous chondrites ([6]). Weathering indices were calculated using molecular proportions and correcting for CaO in apatite. Increasing alteration is indicated by increasing CIA (Chemical Index of Alteration; [7]) and by decreasing WIP (Weathering Index; [8]).

**Table S5. Analytical uncertainties.** \*\* Uncertainty, calculated for 200 mg of prepared sample, becomes important (>25%) for concentrations between the detection limit and the weakest concentration for which the error percentage is indicated.

|                  | ICP-OES iCap6500 | SiO <sub>2</sub> | Al <sub>2</sub> O <sub>3</sub> | Fe <sub>2</sub> O <sub>3</sub> | MnO   | MgO  | CaO  | Na <sub>2</sub> O | K <sub>2</sub> O | TiO <sub>2</sub> | P <sub>2</sub> O <sub>5</sub> |
|------------------|------------------|------------------|--------------------------------|--------------------------------|-------|------|------|-------------------|------------------|------------------|-------------------------------|
|                  | >10%             | <2%              | <2%                            | <2%                            |       |      | <2%  |                   |                  |                  |                               |
|                  | >5%              |                  | <10%                           |                                |       | <2%  | <5%  | <5%               | <5%              | <5%              |                               |
| Uncertainty (%)  | >1%              |                  | <15%                           | <10%                           | <5%   | <10% |      | <10%              | <10%             | <10%             | <5%                           |
| as a function of | >0.5%            | <10%             |                                | <15%                           | <15%  | <15% | <15% | <15%              | <20%             | <20%             | <15%                          |
| concentration    | >0.1%            | <20%             | <20%                           |                                |       |      |      |                   |                  |                  | **                            |
|                  | >0.05%           | **               | **                             | <20%                           | <20%  | <20% | <25% | <25%              | <25%             | <25%             |                               |
|                  | >0.01%           |                  |                                | **                             | **    | **   | **   | **                | **               | **               |                               |
| Detection limit  | D.L%             | 0.05             | 0.04                           | 0.015                          | 0.015 | 0.03 | 0.03 | 0.02              | 0.03             | 0.02             | 0.10                          |

| ICPMS iCapQ &<br>ICP-OES<br>(iCap6500 for Sc) | As    | Ba    | Be   | Bi    | Cd   | Co   | Cr   | Cs   | Cu   | Ga   | Ge    | Hf    | In    | Mo    | Nb    | Ni    | Pb    | Rb    | Sb    | Sc    | Sn    | Sr    |
|-----------------------------------------------|-------|-------|------|-------|------|------|------|------|------|------|-------|-------|-------|-------|-------|-------|-------|-------|-------|-------|-------|-------|
| >100 µg/g                                     |       |       |      |       |      |      |      |      |      |      |       |       |       |       |       |       |       |       |       | <5%   |       |       |
| >50 µg/g                                      | <5%   | <5%   | <5%  |       | <10% | <5%  |      |      | <8%  |      | <5%   |       | <5%   | <5%   | <5%   |       | <10%  | <5%   |       | <10%  | <5%   | <5%   |
| >10 µg/g                                      | <15%  | <15%  | <15% | <5%   | <15% | <10% | <5%  | <5%  | <20% | <5%  |       | <5%   |       | <15%  |       | <5%   |       | <15%  | <5%   |       | <15%  | <10%  |
| >1 µg/g                                       | <20%  | **    |      | <10%  |      | <20% | <10% | <15% | **   | <10% | <10%  | <10%  | <15%  | <20%  | <10%  | **    | <20%  | <20%  | <10%  | <15%  | <20%  | <20%  |
| >0.5 µg/g                                     |       |       |      |       |      |      |      |      |      |      |       |       |       |       |       |       |       |       |       | **    |       |       |
| >0.1 µg/g                                     | **    |       | <20% | <20%  | <20% | **   | **   | <20% |      | <20% | <20%  | <15%  | <20%  | **    | <20%  |       | **    | **    | <20%  |       | **    | **    |
| >0.01 µg/g                                    |       |       | **   | **    | **   |      |      | **   |      | **   | **    | **    | **    |       | **    |       |       |       | **    |       |       |       |
| D.L. µg/g                                     | 0.50  | 5.5   | 0.05 | 0.045 | 0.02 | 0.08 | 0.50 | 0.02 | 2.0  | 0.02 | 0.04  | 0.03  | 0.03  | 0.50  | 0.015 | 2.0   | 0.45  | 0.15  | 0.06  | 0.6   | 0.30  | 0.70  |
|                                               | Ta    | Th    | U    | V     | W    | Y    | Zn   | Zr   | La   | Ce   | Pr    | Nd    | Sm    | Eu    | Gd    | Tb    | Dy    | Ho    | Er    | Tm    | Yb    | Lu    |
| >100 µg/g                                     |       |       |      |       |      |      |      |      |      |      |       |       |       |       |       |       |       |       |       |       |       |       |
| >50 µg/g                                      | <5%   | <5%   | <5%  | <5%   | <5%  | <5%  | <10% | <5%  |      | <5%  | <5%   | <5%   |       |       |       | <5%   |       | <5%   |       | <5%   | <5%   |       |
| >10 µg/g                                      |       |       | <10% | <10%  | <10% |      | <20% | <15% | <5%  | <10% | <10%  | <15%  | <5%   |       | <5%   | <10%  | <5%   |       |       |       | <10%  | <5%   |
| >1 µg/g                                       | <10%  | <10%  | <15% | <15%  | <20% | <15% | **   | **   | <15% | <15% |       |       | <15%  | <5%   | <10%  | <15%  | <10%  | <10%  | <5%   | <10%  | <15%  | <10%  |
| >0.5 µg/g                                     |       |       |      |       |      |      |      |      |      |      |       |       |       |       |       |       |       |       |       |       |       |       |
| >0.1 µg/g                                     | <20%  | <20%  | <20% | **    | **   | <20% |      |      | <20% | <20% | <20%  | <20%  | <20%  | <10%  | <20%  | <20%  | <15%  | <20%  | <10%  | <20%  | <20%  | <20%  |
| >0.01 µg/g                                    | **    | **    | **   |       |      | **   |      |      | **   | **   | **    | **    | **    | **    | **    | **    | **    | **    | **    | **    | **    | **    |
| D.L. µg/g                                     | 0.004 | 0.015 | 0.01 | 0.85  | 0.80 | 0.02 | 7.0  | 1.50 | 0.02 | 0.03 | 0.004 | 0.016 | 0.005 | 0.002 | 0.005 | 0.001 | 0.004 | 0.001 | 0.002 | 0.001 | 0.002 | 0.001 |

## CITED REFERENCES

1. Andò, S.; Morton, A.; Garzanti, E. Metamorphic grade of source rocks revealed by chemical fingerprints of detrital amphibole and garnet. In *Sediment Provenance Studies in Hydrocarbon Exploration and Production*; Scott, R.A., Smyth, H.R., Morton, A.C., Richardson, N., Eds.; Geological Society: London, UK, 2014; Special Publication 386; pp. 351-371.
2. Carignan, J.; Hild, P.; Mevelle, G.; Morel, J.; Yeghicheyan, D. Routine analyses of trace elements in geological samples using flow injection and low pressure on-line liquid chromatography coupled to ICP-MS: A study of geochemical reference materials BR, DR-N, UB-N, AN-G and GH. *Geostand. Newsl.* **2001**, *25*, 187–198.
3. Garzanti, E.; Vezzoli, G. A classification of metamorphic grains in sands based on their composition and grade. *J. Sediment. Res.* **2003**, *73*, 830–837.
4. Garzanti E.; Andò, S.; Vezzoli G. The continental crust as a source of sand (Southern Alps cross-section, northern Italy). *J. Geol.* **2006**, *114*, 533–554
5. Hubert, J.F. A zircon-tourmaline-rutile maturity index and the interdependence of the composition of heavy minerals assemblages with the gross composition and texture of sandstones. *J. Sediment. Petrol.* **1962**, *32*, 440–450.
6. McDonough, W.F.; Sun, S.S. The composition of the Earth. *Chem. Geol.* **1995**, *120*, 223–253.
7. Nesbitt, H.W.; Young, G.M. Early Proterozoic climates and plate motions inferred from major element chemistry of lutites. *Nature* **1982**, *299*, 715–717.
8. Parker, A. An index of weathering for silicate rocks. *Geol. Mag.* **1970**, *107*, 501–504.
