# Supplementary material
Source: MDPI journal article supplement (https://www.mdpi.com/2075-163X/9/10/642)
Supplement: s1 [file s1 › minerals-592247-For XML tables.xlsx]

## Sheet: INFO mancanti
CHRISTIAN		Latitude	Longitude	Day of sampling	Bedload or bank ?	Channel depth ?	Chemical analysis	Grain size
BR 820	Padma				X	X
BR529	Padma				X	X		X
BGP 36	Meghna River	X	X	X	X	X	X	X
BR 826	Meghna River				X	X	X	X
BR 435	Pussur				X	X
BR 434	Pussur				X	X
BGP 34	Meghna estuary	X	X	X	X	X		X
BR 219	Meghna estuary				X	X
BR 1051	Meghna estuary				X	X
SONNE 93-3 63 KL	Bengal shelf						X
SONNE 93-3 105 KL	Bengal shelf						X
GRANULOMETRIE		PT	Schede pesate
BGP 36	Meghna River	X
BR 826	Meghna River	X	X
BR 435	Pussur		X

## Sheet: Table S1 Samples
Sample	Latitude	Longitude	Water Depth	Core depth	River/Shelf	Site	Sampling
PADMA & MEGHNA ESTUARY - bedload sand
S 3562	23°47'25" N	89°47'21" E	bar	---	Padma River	Aricha	2005-04-01
BR 820	23°28'01" N	90°14'16" E	bank	---	Padma River	Mawa	2008-01-14
BR 529	23°27'23" N	90°14'38" E	-11 m	---	Padma River	Mawa	2005-07-24
BR 446	22°49'30" N	90°43'19" E	-11 m	---	Meghna estuary	Rahmat Khali	2004-07-18
BR 219	22°48'03" N	90°38'43" E	-12 m	---	Meghna estuary	Bhola	2002-07-18
BR 8230	22°35'16" N	90°43'20" E	-17 m	---	Meghna estuary	Daulatkhan	2008-09-03
BR 1051	22°34'48" N	90°46'12" E	-10 m	---	Meghna estuary	Daulatkhan	2010-07-12
BGP 34	22°04'03" N	90°46'05" E	bank	---	Meghna estuary	Chor Fasson	1996-08-10
MEGHNA RIVER - bedload sand
BR 826	24°02'59" N	91°00'42" E	bank	---	Meghna River	Baihrab Bazar	2008-01-15
BGP 36	24°02'49" N	90°59'38" E	bank	---	Meghna River	Baihrab Bazar	1996-08-13
MEGHNA ESTUARY - suspended load mud
BR 448	22°49'29" N	90°43'20" E	0 m	---	Meghna estuary	Rahmat Khali	2004-07-18
BENGAL DELTA - Sand and silt
S 3623	22°44'43" N	88°29'45" E	n.d.	28.3-28.5 m	Core	Jaypur	< 2006
BR 435	22°18'14" N	89°36'49" E	- 8 m	---	Pussur distributary	Harbaria	2004-07-16
BR 434	22°18'14" N	89°36'49" E	- 8 m	---	Pussur distributary	Harbaria	2004-07-16
BR 809	21°51'00" N	89°46'16" E	0 m	---	Beach	Katka	2008-01-11
SBZ #1	22°26'06" N	90°45'25" E	n.d.	360 m	Core	Shahbazpur	1995-06-17
BENGAL SHELF - Sand and very coarse silt
SO 307	21°21'17" N	91°20'52" E	- 16 m	0-20 cm	Sonne 188-2	Vibrocorer	2006-07-14
SO 316	21°20'47" N	90°04'18" E	- 19 m	0-100 cm	Sonne 188-2	Vibrocorer	2006-07-17
SO 305	21°04'15" N	91°08'57" E	- 30 m	63-72 cm	Sonne 188-2	Vibrocorer	2006-07-14
SO 347	20°40'33" N	89°46'47" E	- 126 m	280-300 cm	Sonne 188-2	Vibrocorer	2006-07-25
SO 63	20°58'22" N	90°58'26" E	- 66 m	3-7 cm	Sonne 93-3	Piston corer	1994-02-07
SO 105	21°11'23" N	89°46'59" E	- 80 m	686-690 cm	Sonne 93-3	Piston corer	1994-02-12
BENGAL SHELF - Cohesive mud
SO 318	21°11'58" N	90°00'01" E	- 59 m	600 cm	Sonne 188-2	Vibrocorer	2006-07-17
SO 311	21°01'52" N	90°28'07" E	- 87 m	591-600 cm	Sonne 188-2	Vibrocorer	2006-07-16
SO 350	20°37'19" N	89°42'11" E	- 129 m	ca 600 cm	Sonne 188-2	Vibrocorer	2006-07-25

## Sheet: Table S2 Sand PT
unit		sample	operator	method	grain size	% volume	Q	KF	P	Lvf	Lvm	Lcc	Lcd	Lh	Lp	Lms	Lmv	Lmf	Lmb	Lu	muscovite	biotite	pyriboles	& dense minerals	total	MI*	MI	Qp/Q	P/F * 100	Im/I	Vm/V	Cd/C	Mb/M	Sc/S	Q	F	L		Lm	Lv	Ls
BEDLOAD SAND
Padma River		BR 820	G.Vezzoli	Point	130	bulk	54.9708	8.18713	5.84795	0.877193	0	1.53509	1.53509	0	1.31579	4.09357	1.16959	2.04678	0	0	3.36257	2.77778	5.26316	7.01754	100	207.407	160	12.3656	41.6667	0	0	50	5.55556	n.d.	67.3835	17.2043	15.4122	100	37.2093	11.6279	51.1628	100
Padma River		BR 820	S.Andò	Raman	130	bulk	52.5253	7.07071	11.1111	0	0	4.0404	1.0101	0	0	0	0	0	0	0	4.54545	6.56566	6.06061	7.07071	100	n.d.	n.d.	0	61.1111	n.d.	n.d.	20	n.d.	n.d.	69.3333	24	6.66667	100	n.d.	n.d.	n.d.
Meghna River		BR 826	G.Vezzoli	Point	120	bulk	64.2012	8.57988	9.46746	0.295858	0	0	0	0	2.07101	2.07101	0.591716	2.51479	0.147929	0	0.591716	1.77515	5.02959	2.66272	100	252.381	182.759	17.757	52.459	0	0	n.d.	16.6667	n.d.	71.3816	20.0658	8.55263	100	51.9231	7.69231	40.3846	100
Meghna River		BGP 36	G.Vezzoli	Point	90	bulk	54.6326	7.66773	6.07029	0	0	0	0	0	0.638978	7.02875	0.958466	1.4377	2.39617	0	1.4377	1.11821	11.1821	5.43131	100	251.852	247.273	9.43396	44.186	n.d.	n.d.	n.d.	17.5926	n.d.	67.5889	16.996	15.415	100	62.8205	3.84615	33.3333	100
Meghna estuary		BR 219	G.Vezzoli	Point	140	bulk	49.0798	7.05521	6.44172	0.153374	0.153374	0	0	0	0	3.37423	0.920245	1.07362	0.460123	0	0.613497	4.90798	11.0429	14.7239	100	297.436	297.436	13.8889	47.7273	0	n.d.	n.d.	15.3846	n.d.	71.4286	19.6429	8.92857	100	60	12.5	27.5	100
Meghna estuary		BR 446	G.Vezzoli	Point	200	bulk	52.7559	8.92388	11.811	0.262467	0.262467	0	0	0.262467	0	3.67454	1.04987	4.19948	0.262467	0.262467	1.9685	2.23097	8.39895	3.67454	100	309.434	298.182	22.5131	56.962	0	50	n.d.	11.3208	n.d.	63.0094	24.7649	12.2257	100	67.9487	11.5385	20.5128	100
Meghna estuary		BR 1051	G.Vezzoli	Point	240	bulk	54.4959	11.4441	12.5341	0.27248	0	0	0	0.544959	0	4.90463	1.90736	3.26975	0.544959	0	1.77112	6.13079	1.90736	0.27248	100	253.846	244.444	24.7312	52.2727	0	0	n.d.	15.3846	n.d.	60.6061	26.6667	12.7273	100	63.0952	10.7143	26.1905	100
Meghna estuary		BR 8230	G.Vezzoli	Point	190	bulk	52.0436	7.90191	9.26431	0	0	0	0	0	0.27248	1.90736	1.63488	2.58856	0.408719	0	0.544959	1.90736	12.2616	9.26431	100	260.606	252.941	14.6739	53.9683	0	n.d.	n.d.	15.1515	n.d.	68.4588	22.5806	8.96057	100	70	12	18	100
DELTA SAND & SILT
Pussur distributary		BR 435	G.Vezzoli	Point	60	bulk	56.3863	4.36137	3.11526	0	0	3.42679	0.623053	0	0.934579	2.80374	0	1.55763	0	0	4.98442	18.0685	2.49221	1.24611	100	241.176	205	3.91061	41.6667	n.d.	n.d.	15.3846	0	n.d.	77.0213	10.2128	12.766	100	31.6667	0	68.3333	100
Holocene delta		S 3623	G.Vezzoli	Point	230	bulk	60.7251	11.1782	5.13595	1.20846	0	0.996979	0.664653	0	2.26586	1.51057	0.60423	1.81269	0	0	5.28701	6.49547	0.906344	1.20846	100	231.25	134.545	12.8866	31.4815	0	0	40	9.375	n.d.	70.5263	18.9474	10.5263	100	31.6667	16.6667	51.6667	100
Katka beach		BR 809	G.Vezzoli	Point	140	bulk	59.4752	6.99708	6.41399	0.291545	0	0	0.728863	0	1.45773	3.49854	1.16618	2.18659	0.291545	0	2.04082	3.207	3.79009	8.45481	100	235.484	197.297	12.8205	47.8261	0	0	100	4.7619	n.d.	72.0848	16.2544	11.6608	100	50	9.09091	40.9091	100
Quaternary delta		SBZ #1	G.Vezzoli	Point	700	bulk	70.2703	9.26641	5.79151	0.3861	0	0	0	0.3861	2.3166	2.7027	1.9305	1.35135	0.19305	0	3.861	1.1583	0	0.3861	100	262.5	218.75	22	38.4615	7.69231	0	n.d.	1.25	n.d.	74.2857	15.9184	9.79592	100	41.6667	14.5833	43.75	100
SHELF SAND & VERY COARSE SILT
Subaqueous delta		SO 307	G.Vezzoli	Point	180	bulk	53.3163	9.18367	10.9694	0	0	0	0	0	0.765306	3.82653	0.510204	4.08163	0.510204	0.255102	3.31633	7.14286	4.08163	2.04082	100	264.103	239.535	14.9254	54.4304	0	n.d.	n.d.	7.69231	n.d.	63.9144	24.159	11.9266	100	69.2308	3.84615	26.9231	100
Subaqueous delta		SO 316	G.Vezzoli	Point	65	bulk	54.2029	7.82609	7.82609	0	0	0	0	0	0.57971	3.18841	0.289855	1.73913	0	0	2.02899	14.2029	4.63768	3.47826	100	215.789	195.238	6.95187	50	0	n.d.	n.d.	2.63158	n.d.	71.6475	20.6897	7.66284	100	60	2.5	37.5	100
Subaqueous delta		SO 305	G.Vezzoli	Point	50	bulk	42.0118	7.10059	3.5503	0.295858	0	0	0.295858	0	1.47929	2.36686	0	1.18343	0	0	14.497	23.6686	2.36686	1.18343	100	n.d.	168.421	7.74648	33.3333	n.d.	0	100	7.69231	n.d.	72.0812	18.2741	9.64467	100	42.1053	5.26316	52.6316	100
Subaqueous delta		SO 347	G.Vezzoli	Point	80	bulk	64.7619	6.98413	9.52381	0.31746	0	0	0	0.31746	1.26984	4.12698	1.26984	1.26984	0	0	3.1746	6.66667	0.31746	0	100	181.818	148.148	7.88177	57.6923	n.d.	0	n.d.	15.9091	n.d.	72.0848	18.3746	9.54064	100	46.2963	11.1111	42.5926	100
Subaqueous delta		SO 105	G.Vezzoli	Point	55	bulk	56.4417	2.76074	2.45399	0	0	3.06748	4.60123	0	1.84049	2.14724	1.53374	2.76074	1.22699	0	1.99387	5.9816	7.05521	6.13497	100	261.538	219.355	3.27869	47.0588	n.d.	n.d.	60	26.9231	n.d.	71.5953	6.61479	21.7899	100	33.9286	4.46429	61.6071	100
BEDLOAD SAND (multiple-window analyses)
Padma River		S 3562	G.Vezzoli	Point	80-125	0.11857	38.5714	6.57143	8	0.142857	0.142857	0	0	0	1.14286	0.285714	0.285714	1.85714	0.714286	0	0.857143	2.28571	13.7143	25.4286	100	295.238	248	12.3077	54.902	0	n.d.	n.d.	23.8095	n.d.	66.8317	25.2475	7.92079	100	62.5	9.375	28.125	100
Padma River		S 3562	G.Vezzoli	Point	125-180	0.415901	44.7059	6.17647	9.70588	0.294118	0	0	0	0	1.47059	2.35294	0.588235	0.882353	0.882353	0.588235	0.294118	2.94118	17.0588	12.0588	100	254.167	203.333	24.6667	61.1111	0	0	n.d.	27.0833	50	66.087	23.4783	10.4348	100	50	12.5	37.5	100
Padma River		S 3562	G.Vezzoli	Point	180-250	0.420645	55.5556	8.70871	10.2102	0.225225	0.675676	0	0	0	1.2012	4.2042	1.5015	3.3033	0.3003	0	1.5015	3.003	7.20721	2.4024	100	296.154	256.667	17.0588	53.9683	27.2727	75	n.d.	10.5769	n.d.	64.6853	22.028	13.2867	100	56.5789	14.4737	28.9474	100
Padma River		S 3562	G.Vezzoli	Point	250-355	0.0296598	45.9215	8.45921	9.36556	0.302115	0.906344	0	0	0.302115	1.20846	3.62538	0.906344	3.62538	0	0	6.0423	17.8248	1.51057	0	100	273.529	221.429	23.2394	52.5424	0	75	n.d.	13.2353	n.d.	61.5385	23.8866	14.5749	100	54.1667	15.2778	30.5556	100
Padma River		S 3562	G.Vezzoli	Point	355-500	0.00112904
Padma River		S 3562			166 mm	0.985905	48.6383	7.37442	9.70566	0.246719	0.333112	0	0	0.0090992	1.30817	2.93313	0.951492	2.11644	0.586919	0.24843	1.05077	3.33694	11.9797	9.18066	100	282.922	239.135		57.1149						65.3285	22.9411	11.7304	100	54.6159	13.5088	31.8753	100
Padma River		S 3562	G.Vezzoli	Point	80-106	0.0508304	35.0877	7.30994	5.55556	0.877193	0.292398	0	0	0	0.584795	1.46199	0.584795	2.04678	0.292398	0.292398	0.877193	3.21637	11.6959	29.8246	100	273.684	192.593	13.0435	43.1818	n.d.	25	n.d.	7.89474	0	64.5161	23.6559	11.828	100	54.5455	25	20.4545	100
Padma River		S 3562	G.Vezzoli	Point	106-125	0.0720615	39.7661	7.60234	5.26316	0	0	0	0	0	0	2.33918	1.16959	1.46199	0.292398	0	1.31579	5.11696	16.9591	18.7135	100	286.207	286.207	15.5039	40.9091	0	n.d.	n.d.	12.069	n.d.	68.6869	22.2222	9.09091	100	66.6667	11.1111	22.2222	100
Padma River		S 3562	G.Vezzoli	Point	125-150	0.1555	40.708	7.66962	7.07965	0.294985	0	0	0	0	1.17994	1.17994	0.589971	1.03245	0.737463	0	0.294985	2.0649	21.5339	15.6342	100	255	196.154	26.1538	48	0	0	n.d.	25	n.d.	67.3171	24.3902	8.29268	100	52.9412	11.7647	35.2941	100
Padma River		S 3562	G.Vezzoli	Point	150-180	0.24431	52.2796	8.51064	7.59878	1.21581	0	0	0	0	1.82371	2.43161	2.12766	3.49544	0.759878	0.303951	0.607903	0.911854	12.766	5.16717	100	269.231	214.286	21.3415	47.1698	0	0	n.d.	24.359	0	64.9057	20	15.0943	100	55	20	25	100
Padma River		S 3562	G.Vezzoli	Point	180-212	0.324946	58.3832	7.78443	8.98204	0.598802	0.898204	0	0	0	0.598802	2.69461	1.49701	4.64072	0.449102	0	0.449102	2.84431	8.38323	1.79641	100	283.721	244	25.2747	53.5714	0	60	n.d.	8.13953	n.d.	67.474	19.3772	13.1488	100	63.1579	19.7368	17.1053	100
Padma River		S 3562	G.Vezzoli	Point	212-250	0.111599	59.633	10.3976	9.17431	0.917431	0.611621	0	0	0	2.14067	2.75229	0.30581	4.58716	0.917431	0	3.66972	3.0581	1.52905	0.30581	100	325.532	250.82	25.4237	46.875	0	40	n.d.	14.8936	n.d.	65.2174	21.4047	13.3779	100	57.5	13.75	28.75	100
Padma River		S 3562	G.Vezzoli	Point	250-300	0.0202832	46.4174	12.7726	11.838	0.700935	2.1028	0	0	0.311526	1.55763	2.80374	0.311526	3.27103	0.155763	0.311526	3.27103	12.6168	1.24611	0.311526	100	310.256	228.302	31.3433	48.1013	5.26316	75	n.d.	10.2564	0	56.2264	29.8113	13.9623	100	44.5946	27.027	28.3784	100
Padma River		S 3562	G.Vezzoli	Point	300-355	0.00252635	31.8452	5.65476	7.14286	0.595238	0.297619	0	0	0	0.595238	1.19048	0	2.08333	0	0.297619	7.44048	40.7738	1.19048	0.892857	100	346.154	290.323	24.4681	55.814	0	33.3333	n.d.	3.84615	0	64.0719	25.7485	10.1796	100	55.8824	20.5882	23.5294	100
Padma River		S 3562	G.Vezzoli	Point	355-425	0.00252635	0	0	0	0	0	0	0	0	0	0	0	0	0	0	53.5	46.5	0	0	100	n.d.	n.d.	n.d.	n.d.	n.d.	n.d.	n.d.	n.d.	n.d.	n.d.	n.d.	n.d.		n.d.	n.d.	n.d.
Padma River		S 3562	G.Vezzoli	Point	425-500	0.00252635	0	0	0	0	0	0	0	0	0	0	0	0	0	0	57.5	42.5	0	0	100	n.d.	n.d.	n.d.	n.d.	n.d.	n.d.	n.d.	n.d.	n.d.	n.d.	n.d.	n.d.		n.d.	n.d.	n.d.
Padma River		S 3562	G.Vezzoli	Point	500-710	0.00252635	0	0	0	0	0	0	0	0	0	0	0	0	0	0	65.5	34.5	0	0	100	n.d.	n.d.	n.d.	n.d.	n.d.	n.d.	n.d.	n.d.	n.d.	n.d.	n.d.	n.d.		n.d.	n.d.	n.d.
Padma River		S 3562	G.Vezzoli	Point	710-1000	0.00252635	0	0	0	0	0	0	0	0	0	0	0	0	0	0	73.4375	26.5625	0	0	100	n.d.	n.d.	n.d.	n.d.	n.d.	n.d.	n.d.	n.d.	n.d.	n.d.	n.d.	n.d.		n.d.	n.d.	n.d.
Padma River		S 3562	G.Vezzoli	Point	1-2 mm	0.00252635	0	0	0	0	0	0	0	0	0	0	0	0	0	0	100	0	0	0	100	n.d.	n.d.	n.d.	n.d.	n.d.	n.d.	n.d.	n.d.	n.d.	n.d.	n.d.	n.d.		n.d.	n.d.	n.d.
Padma River		S 3562			162 mm	0.994688	51.3209	8.30349	7.96256	0.712969	0.426035	0	0	0.00643422	1.14589	2.30441	1.27533	3.376	0.598471	0.0979494	0.992213	2.74988	11.4118	7.31573	100	284.176	232.593		48.5643						66.1945	20.9802	12.8253	100	58.4635	18.3602	23.1763	100
Meghna estuary		BR 446	G.Vezzoli	Point	125-150	0.106124	46.2908	7.12166	7.12166	0.296736	0.296736	0	0	0	1.18694	2.37389	1.18694	1.33531	0.445104	0	0.593472	1.48368	14.5401	15.727	100	252.174	193.333	14.2857	50	n.d.	50	n.d.	26.087	n.d.	68.4211	21.0526	10.5263	100	50	16.6667	33.3333	100
Meghna estuary		BR 446	G.Vezzoli	Point	150-180	0.254401	53.1343	9.25373	9.25373	0.597015	0	0	0	0	2.38806	2.68657	0.895522	4.1791	0.597015	0	1.64179	0.447761	9.85075	5.07463	100	287.5	225.49	23.6364	50	40	0	n.d.	13.75	n.d.	64.0288	22.3022	13.6691	100	57.8947	9.21053	32.8947	100
Meghna estuary		BR 446	G.Vezzoli	Point	180-212	0.363501	60.8434	12.3494	13.253	0.60241	0.903614	0	0	0.301205	1.50602	1.80723	0.903614	2.56024	0.451807	0	0	1.80723	2.10843	0.60241	100	284.848	213.636	22.5806	51.7647	15.3846	60	n.d.	9.09091	n.d.	63.7224	26.8139	9.46372	100	48.3333	21.6667	30	100
Meghna estuary		BR 446	G.Vezzoli	Point	212-250	0.142822	56.7901	13.5802	11.4198	0.617284	0.617284	0	0	0	1.23457	2.77778	0.617284	6.32716	0.462963	0	1.38889	3.54938	0.617284	0	100	304.545	252.83	28.1609	45.679	10	50	n.d.	5.68182	n.d.	60.1307	26.4706	13.3987	100	67.0732	12.1951	20.7317	100
Meghna estuary		BR 446	G.Vezzoli	Point	250-355	0.0344657	54.3027	9.19881	9.19881	0.890208	0.890208	0	0	0	1.78042	2.96736	0.296736	3.7092	0.74184	0	6.23145	8.90208	0.593472	0.296736	100	280	188.462	22.1557	50	0	42.8571	n.d.	12.8571	n.d.	64.6643	21.9081	13.4276	100	53.9474	17.1053	28.9474	100
Meghna estuary		BR 446	G.Vezzoli	Point	355-425	0.00148773	15	2	2	0	0	0	0	0	0	0.5	0	0.5	0	0	54	25	0	1	100	n.d.	n.d.	n.d.	50	n.d.	n.d.	n.d.	n.d.	n.d.	75	20	5	100	75	0	25	100
Meghna estuary		BR 446	G.Vezzoli	Point	425-500	0.000495909	1	0.5	0.5	0	0	0	0	0	0	0.5	0	0.5	0	0	56.5	36.5	0	4	100	n.d.	n.d.	n.d.	50	n.d.	n.d.	n.d.	n.d.	n.d.	n.d.	n.d.	n.d.		n.d.	n.d.	n.d.
Meghna estuary		BR 446	G.Vezzoli	Point	500-710	0.00148773	4.0404	0	0	0	0	0	0	0	0	0	0	0	0	0	65.6566	29.2929	0	1.0101	100	n.d.	n.d.	n.d.	n.d.	n.d.	n.d.	n.d.	n.d.	n.d.	n.d.	n.d.	n.d.		n.d.	n.d.	n.d.
Meghna estuary		BR 446	G.Vezzoli	Point	710-1000	0.000247954	0	0	0	0	0	0	0	0	0	0	0	0	0	0	94.0476	5.95238	0	0	100	n.d.	n.d.	n.d.	n.d.	n.d.	n.d.	n.d.	n.d.	n.d.	n.d.	n.d.	n.d.		n.d.	n.d.	n.d.
Meghna estuary		BR 446	G.Vezzoli	Point	1-2 mm	0	The > 1 mm class contains only wood fragments
Meghna estuary		BR 446			175 mm	0.905033	55.9898	10.9475	10.9689	0.578378	0.536145	0	0	1.6762	0.123207	2.30845	0.859448	3.51646	0.502515	0	1.22752	2.04837	5.31586	3.40131	100	286.764	222.005		50.0373						63.6197	24.903	11.4773	100	55.4701	15.2884	29.2415	100

## Sheet: Table S3 Sand HM
unit	sample	operator	method	GSZ (mm)	GSZ class (mm)	% volume	HMC	tHMC	zircon	tourmaline	rutile	anatase	& Ti oxides	titanite	apatite	monazite	barite	hornbblende	actinolite	clinopyroxene	enstatite	hypersthene	spinel	epidote	clinozoisite	zoisite	allanite	other epidotes	chloritoid	garnet	staurolite	andalusite	kyanite	sill. prismatica	fibrolite	Total Transparent	ZTR	HCI	MMI	SI	% transparent	% opaques	% turbid	Total
BEDLOAD SAND
Padma River	BR 820	S.Andò	Grain	130	32-500	0.991692	12.801	11.7814	0.480769	2.40385	0	0	1.44231	1.92308	1.44231	0	0	33.6538	2.88462	4.80769	0.480769	0	0	26.4423	0.961538	5.28846	0.480769	0.961538	0.480769	13.4615	0.480769	0	1.44231	0.240385	0.240385	100	2.88462	5.71429	55.5556	n.d.	92.0354	7.07965	0.884956	100
Meghna River	BR 826	S.Andò	Grain	120	32-500	0.994609	10.5348	9.85516	0.492611	0.985222	0.492611	0	1.47783	3.94089	1.97044	0	0	49.7537	3.44828	3.44828	0	0	0.492611	21.6749	0	1.47783	0	1.97044	0.492611	6.89655	0.492611	0	0.492611	0	0	100	1.97044	5.61056	n.d.	n.d.	93.5484	5.99078	0.460829	100
Meghna River	BGP 36	S.Andò	Grain	90	63-250	0.86	10.3049	9.36811	1.36364	0	0.454545	0	0	5	0	0	0	60	1.81818	0	0	0	0	14.5455	0.454545	4.54545	0	0	0.909091	8.63636	1.36364	0	0.454545	0	0.454545	100	1.81818	9.34343	38.0952	n.d.	90.9091	4.13223	4.95868	100
Meghna estuary	BR 219	S.Andò	Grain	140	63-250	0.98	33.8921	29.5904	0.440529	1.32159	0.440529	0	0	5.28634	0	0	0	27.7533	0.440529	0.881057	0	0	0	32.1586	3.0837	1.32159	0	1.32159	0.881057	22.467	0.881057	0	1.32159	0	0	100	2.20264	7.93651	38.0952	n.d.	87.3077	9.23077	3.46154	100
Meghna estuary	BR 446	M.Limonta	Point	200	> 15	0.995827	15.9592	14.2245	1.46341	1.95122	0.487805	0	0	2.92683	1.46341	0	0	45.3659	0	0.97561	0	0.487805	0	18.0488	0	0	0	1.95122	0	21.9512	1.95122	0	0.97561	0	0	100	3.90244	13.6201	44.4444	n.d.	89.1304	5.65217	5.21739	100
Meghna estuary	BR 1051	M.Limonta	Point	240	> 15	0.994367	8.12206	6.91988	0.423729	0.847458	0	0	0	2.11864	1.27119	0	0	54.2373	0.423729	0.423729	0	0	0	14.8305	0	0	0	3.38983	0	16.1017	0.847458	0.423729	0.847458	1.69492	2.11864	100	1.27119	9.91736	84.6154	44.4444	85.1986	5.41516	9.38628	100
Meghna estuary	BR 8230	M.Limonta	Point	190	> 15	0.973835	22.09	19.8608	1.02041	1.53061	1.02041	0	0	2.55102	0	0	0	46.9388	2.04082	2.55102	0	0	0	22.9592	0	0	0	1.02041	0	15.8163	0.510204	0	0.510204	1.53061	0	100	3.57143	9.78261	n.d.	100	89.9083	6.42202	3.66972	100
DELTA SAND & SILT
Pussur distributary	BR 435	S.Andò	Grain	60	32-500	0.867464	3.319	2.84084	0	5.44554	1.48515	0	4.45545	5.44554	1.48515	0	0	23.2673	4.45545	4.45545	0	0	0	23.2673	0.49505	7.42574	0.49505	0.49505	0.990099	12.8713	0.49505	0	1.9802	0.990099	0	100	6.93069	5.67376	55.5556	n.d.	85.5932	7.20339	7.20339	100
Pussur distributary	BR 434	S.Andò	Grain	<32	> 32	<50%	n.d.	n.d.	2.36967	4.73934	1.89573	0	3.79147	3.79147	1.89573	0	0	23.2227	6.63507	6.16114	1.4218	0	0	21.327	0	1.4218	0.473934	0.473934	1.4218	13.7441	0.473934	0	1.4218	1.89573	1.4218	100	9.00474	9.52381	66.6667	57.1429	83.0709	11.4173	5.51181	100
Holocene delta	S 3623	S.Andò	Grain	230	32-500	0.97094	3.12737	2.76314	2.72727	5	0.909091	0	2.72727	4.09091	2.27273	0.454545	0	23.6364	2.27273	9.09091	0	0	0.454545	15.9091	0.454545	6.36364	0	3.18182	0.454545	15.9091	0	0	2.72727	0.227273	1.13636	100	8.63636	3.84615	70	16.6667	88.3534	9.23695	2.40964	100
Katka beach	BR 809	S.Andò	Grain	140	32-500	1	14.3567	12.43	1	6.5	0.5	0	2	4	4	0.5	0	20	1.5	5	0	0	0	14	2	0	0	0.5	0.5	32	1.5	0	4	0.5	0	100	8	5.83333	56.4103	n.d.	86.5801	12.5541	0.865801	100
Katka beach	BR 809	S.Andò	Point	140	32-500	1	14.7872	13.3821	2	4.5	0	0	1	3.5	0.5	0	0	27	1	4	0	0	0	16.5	0	0.5	1	0	0	31	2.5	0	3	0.25	1.75	100	6.5	8.64198	64.4444	12.5	90.4977	7.69231	1.80995	100
SHELF SAND & VERY COARSE SILT
Subaqueous delta	SO 307	S.Andò	Grain	180	> 15	0.993367	12.758	11.9039	1.79372	0.896861	0.44843	0	0	2.24215	1.34529	0	0	48.4305	0.44843	1.34529	0	0	0	29.5964	0	0	0	0.896861	1.34529	8.52018	0.44843	0	0	2.24215	0	100	3.13901	9.25926	59.2593	100	93.3054	2.92887	3.76569	100
Subaqueous delta	SO 316	S.Andò	Grain	65	> 15	0.983677	8.29654	7.74097	2.39234	2.39234	0.478469	0	0	1.91388	1.91388	0	0	50.2392	0	3.34928	0	0	0	25.3589	0	0	0	0.956938	0	8.61244	0.956938	0	1.43541	0	0	100	5.26316	5.71429	n.d.	n.d.	93.3036	4.01786	2.67857	100
Subaqueous delta	SO 305	S.Andò	Grain	50	32-500	0.908435	5.55395	5.34825	0	3.36538	0	0	0	4.32692	0.480769	0	0	49.5192	3.36538	3.84615	0	0	0	26.4423	0	4.32692	0.480769	0	0	2.88462	0	0	0.480769	0.480769	0	100	3.36538	3.23625	n.d.	n.d.	96.2963	2.77778	0.925926	100
Subaqueous delta	SO 347	S.Andò	Grain	80	> 15	0.937934	5.375	4.29577	8.37438	5.41872	3.94089	0	0	0.492611	0.492611	0	0	28.0788	0	0.492611	0	0	0	37.931	0	0	0	0.492611	4.4335	7.88177	0.985222	0	0.985222	0	0	100	17.734	2.33918	15.3846	n.d.	79.9213	7.48031	12.5984	100
Subaqueous delta	SO 105	S.Andò	Grain	53	63-250	0.711667	2.66446	2.48756	0	0.444444	1.33333	0	0	1.77778	0	0	0	62.2222	1.33333	1.77778	0	0.444444	0	20.8889	0	4.88889	0.444444	0	0.888889	2.22222	0.444444	0	0.444444	0	0.444444	100	1.77778	3.80952	n.d.	n.d.	93.361	0.829876	5.80913	100
BEDLOAD SAND (multiple-window analyses)
Padma River	S 3562	S.Andò	Grain		40-62	0.00411724	22.6784	20.1369	2.42718	0.970874	2.91262	0	0.970874	0	3.39806	0	0	40.7767	4.85437	2.91262	0	0	0	26.699	0.970874	0.970874	0	0	0.485437	8.25243	0.485437	0	0.970874	0.728155	1.21359	100	6.31068	2.77778	70.8333	37.5	88.7931	8.18966	3.01724	100
Padma River	S 3562	S.Andò	Grain		62-80	0.00997792	29.3824	24.7431	5.76923	0.480769	1.92308	0	0.480769	2.88462	2.40385	0.480769	0	39.9038	1.92308	2.40385	0	0	0	22.1154	0.480769	0	0.480769	0	0.961538	15.3846	0.480769	0	0.961538	0.480769	0	100	8.17308	6.4257	44.4444	n.d.	84.2105	14.9798	0.809717	100
Padma River	S 3562	S.Andò	Grain		80-125	0.11857	43.5396	37.9216	0.462963	0.925926	0.462963	0	0	1.85185	2.31481	0	0	40.7407	3.24074	2.77778	0	0	0.462963	25.463	0	0	0.462963	0.462963	0.925926	18.0556	0.925926	0	0.462963	0	0	100	1.85185	5.68182	n.d.	n.d.	87.0968	12.5	0.403226	100
Padma River	S 3562	S.Andò	Grain		125-180	0.415901	32.0181	29.9619	0	0.490196	0.490196	0	0	5.39216	2.45098	0	0	47.0588	2.94118	3.92157	0	0.980392	0	21.0784	0.490196	0	0.490196	0.490196	0	12.7451	0.490196	0	0	0.245098	0.245098	100	0.980392	4.51389	n.d.	n.d.	93.578	4.58716	1.83486	100
Padma River	S 3562	S.Andò	Grain		180-250	0.420645	10.8147	10.1358	0	1.43541	0.478469	0	0	0.478469	0.478469	0	0	54.067	2.87081	3.34928	0	1.43541	0	26.3158	0	0.478469	0	0.478469	0.478469	4.78469	0.478469	0	0.478469	0.956938	0.956938	100	1.91388	5.01475	71.4286	50	93.722	0	6.27803	100
Padma River	S 3562			166	Phi/2	0.969211	23.441	21.5753	0.172021	0.769845	0.507928	0	0.00924267	3.63193	2.03544	0.00550763	0	47.021	2.98545	3.54844	0	0.85086	0.0965919	23.0629	0.292685	0.0983939	0.385541	0.474693	0.300725	12.2912	0.57866	0	0.206001	0.339348	0.335707	100	1.44979	4.85175	28.3204	48	92.0406	5.58505	2.37435	100
Padma River	S 3562	S.Andò	Grain		62-75	0.0110765	25.7754	19.1944	5.2381	1.42857	1.90476	0	0.47619	2.85714	2.38095	0.952381	0	32.381	4.7619	1.90476	0	1.42857	0	25.7143	0	0	0.47619	1.90476	0.47619	13.3333	0.952381	0	0	0.952381	0.47619	100	8.57143	3.92157	61.1111	66.6667	74.4681	24.8227	0.70922	100
Padma River	S 3562	S.Andò	Grain		75-80	0.00576951	35.3833	26.4388	3.9801	1.49254	0.995025	0	0.497512	6.46766	2.98507	0	0	32.3383	2.48756	1.49254	0	1.49254	0	24.8756	0	0.995025	0.995025	0.497512	0.497512	17.4129	0	0	0.497512	0	0	100	6.46766	5.12821	n.d.	n.d.	74.7212	24.9071	0.371747	100
Padma River	S 3562	S.Andò	Grain		80-106	0.0508304	42.8508	35.9445	0.873362	3.05677	0.873362	0	1.74672	2.62009	3.05677	0.873362	0	33.6245	2.18341	1.74672	0.436681	1.31004	0	24.0175	0.436681	0.436681	1.31004	0.873362	0	17.4672	1.31004	0	1.31004	0.218341	0.218341	100	4.80349	6.92641	57.1429	n.d.	83.8828	14.652	1.4652	100
Padma River	S 3562	S.Andò	Grain		106-125	0.0720615	46.8068	44.1101	0	0	0.436681	0	0.873362	7.42358	2.62009	0	0	38.8646	3.93013	0	0	0.436681	0	19.6507	0	0.436681	0.436681	0	0.436681	21.3974	1.31004	0	0.436681	0.873362	0.436681	100	0.436681	5.24345	58.3333	66.6667	94.2387	5.76132	0	100
Padma River	S 3562	S.Andò	Grain		125-150	0.1555	39.0256	36.1536	0	0.934579	0.46729	0	0	2.80374	1.40187	0	0	49.5327	2.80374	2.33645	0	0.46729	0	23.3645	0	0.46729	0.46729	0.46729	0	12.1495	1.86916	0	0.46729	0	0	100	1.40187	2.51572	n.d.	n.d.	92.6407	5.19481	2.1645	100
Padma River	S 3562	S.Andò	Grain		150-180	0.24431	31.0446	30.5925	0	0.985222	0.492611	0	0	1.97044	2.46305	0	0.492611	51.7241	1.97044	2.46305	0	0.492611	0	25.1232	0	1.47783	0.492611	0	0.985222	7.38916	0	0	0	0.985222	0.492611	100	1.47783	8.57143	n.d.	66.6667	98.5437	0.485437	0.970874	100
Padma River	S 3562	S.Andò	Grain		180-212	0.324946	14.9036	13.802	0	0.469484	0	0	0	1.40845	2.34742	0	0	51.1737	3.28638	2.34742	0.469484	0.938967	0	27.23	0	0	0	0.469484	0.938967	6.10329	1.87793	0	0.469484	0.469484	0	100	0.469484	8.25688	37.5	n.d.	92.6087	1.30435	6.08696	100
Padma River	S 3562	S.Andò	Grain		212-250	0.111599	4.51121	3.98341	0	1	0	0	0	0	0	0	0	52.5	3	3.5	0	1.5	0	25.5	0	0	0	0	1	7	0	0	1	0.25	3.75	100	1	9.52381	77.7778	6.25	88.3002	0.220751	11.479	100
Padma River	S 3562			162	Phi/4	0.976093	25.6533	23.9693	0.141752	0.909725	0.420979	0	0.262633	2.85448	2.20945	0.0768575	0.157367	47.6441	2.75411	2.02819	0.124099	0.662493	0	24.2855	0.0341015	0.684304	0.442099	0.291037	0.580629	11.0887	1.09807	0	0.386159	0.553843	0.309326	100	1.47246	6.51036	26.9054	29.4864	93.4354	4.19937	2.36525	100
Meghna estuary	BR 446	S.Andò	Grain		80-106	0.0292586	26.5727	17.7987	4.22535	2.34742	2.34742	0	1.40845	4.22535	0.938967	0.469484	0	37.5587	2.34742	3.28638	0	0.469484	0	15.0235	0	0	0.469484	0.469484	0.469484	18.7793	0.469484	0	1.87793	1.87793	0.938967	100	8.92019	3.75	75	66.6667	66.9811	31.761	1.25786	100
Meghna estuary	BR 446	S.Andò	Grain		106-125	0.0481031	36.39	28.2722	0.49505	0.49505	0.990099	0	0.990099	2.9703	0.990099	0	0	35.6436	1.48515	4.45545	0	0.49505	0	20.297	0	0.49505	0.49505	0.49505	0.49505	26.7327	0.990099	0	0.49505	0.49505	0	100	1.9802	4.16667	n.d.	n.d.	77.6923	21.5385	0.769231	100
Meghna estuary	BR 446	S.Andò	Grain		125-150	0.106124	33.2704	30.8059	0	0.5	0.5	0	0.5	4.5	3	0	0	41.5	0.5	4	0	0.5	0	23.5	0	0.5	1.5	1	0.5	16.5	0	0	1	0	0	100	1	4.01606	n.d.	n.d.	92.5926	5.55556	1.85185	100
Meghna estuary	BR 446	S.Andò	Grain		150-180	0.254401	20.2787	19.606	0	2.94118	0	0	0.490196	5.39216	1.47059	0	0	50.9804	0.980392	1.96078	0	0.980392	0	22.0588	0	0.490196	0	0	0	10.2941	1.47059	0	0	0	0.490196	100	2.94118	8.97436	n.d.	n.d.	96.6825	1.4218	1.89573	100
Meghna estuary	BR 446	S.Andò	Grain		180-212	0.363501	6.70377	6.25081	0	1.44928	0.483092	0	0.483092	1.44928	1.44928	0	0	51.6908	1.93237	3.86473	0	0	0	20.2899	0	0.483092	0	0.483092	0.966184	9.66184	1.44928	0	0	0.483092	3.38164	100	1.93237	4.6729	69.2308	12.5	93.2432	0.45045	6.30631	100
Meghna estuary	BR 446	S.Andò	Grain		212-250	0.142822	2.0651	1.818	0	2.42718	0	0	0.485437	1.94175	0	0	0	52.4272	0.970874	3.39806	0	0	0	21.3592	0	0.485437	0	0	0	9.70874	0.485437	0	0.485437	1.45631	4.36893	100	2.42718	8.02469	92.8571	25	88.0342	0	11.9658	100
Meghna estuary	BR 446			175	Phi/4	0.94421	14.4045	13.1096	0.217365	1.76932	0.408695	0	0.578019	4.06221	1.74728	0.0186028	0	46.6987	1.14448	3.16363	0	0.585528	0	21.6142	0	0.472271	0.443159	0.409217	0.375274	13.7069	0.989914	0	0.384568	0.246699	0.964026	100	2.39538	6.41804	37.8972	18.7924	91.0106	6.237	2.7524	100
SUSPENDED-LOAD MUD (multiple-window analyses)
Meghna estuary	BR 448	S.Andò	Grain		10-15	0.13281	6.35008	4.91827	0	0.462963	0.462963	0	0	2.77778	1.38889	0	0	37.037	8.33333	5.09259	0	0	0	37.5	0	0.462963	0	0	0.462963	3.24074	0.462963	0	0	2.08333	0.231481	100	0.925926	0	76.1905	90	77.452	12.1493	10.3987	100
Meghna estuary	BR 448	S.Andò	Grain		15-32	0.0435753	7.09312	5.89089	0	1	0	0	1	2.5	1	0	0	51	4.5	3	0	0	0	30.5	0	0	0.5	0	0.5	2.5	0	0	0.5	0.75	0.75	100	1	0.980392	n.d.	n.d.	83.0508	3.38983	13.5593	100
Meghna estuary	BR 448	S.Andò	Grain		32-40	0.0288937	5.31085	4.94709	0	1.47059	0	0	0	3.92157	2.45098	0	0	44.6078	3.92157	4.41176	0	0	0	31.3725	0	0	0	1.47059	1.47059	2.94118	0.490196	0	0	0.490196	0.980392	100	1.47059	1.0989	47.619	n.d.	93.1507	1.82648	5.02283	100
Meghna estuary	BR 448	S.Andò	Grain		40-62	0.042568	2.88341	2.49376	0	1.5	0.5	0	0	3.5	1.5	0	0	53	5	3.5	0.5	0	0	25.5	0	0.5	0	0.5	0.5	2	0.5	0	0.5	0.5	0.5	100	2	2.83019	n.d.	n.d.	86.4865	0.900901	12.6126	100
Meghna estuary	BR 448	S.Andò	Grain		62-80	0.00394005	0.497859	0.289079	0	1.17647	0	0	2.35294	2.35294	3.52941	0	0	48.2353	8.23529	9.41176	0	0	0	22.3529	0	1.17647	0	0	0	1.17647	0	0	0	0	0	100	1.17647	4.87805	n.d.	n.d.	58.0645	3.22581	38.7097	100
Meghna estuary	BR 448	S.Andò	Grain		80-125	0.00169963	0.188336	0.113001	0	0	0	0	0	0	0	0	0	30.7692	0	23.0769	0	0	0	30.7692	0	0	0	0	7.69231	0	0	0	0	7.69231	0	100	0	n.d.	n.d.	n.d.	60	10	30	100
Meghna estuary	BR 448			4	Phi/2	0.253487	5.64492	4.57743	0	0.879741	0.320392	0	0.201719	2.98893	1.49604	0	0	43.4225	6.44626	4.48866	0.0893185	0	0	33.1255	0	0.333451	0	0.369171	0.638307	2.81095	0.384409	0	0.177119	1.36293	0.46459	100	1.20013	1.02687	47.7573	n.d.	81.0894	8.17263	10.738	100
SHELF SILT (multiple-window analyses)
Subaqueous delta	SO 63	S.Andò	Grain		10-32	0.323043	9.31797	8.65536	0.478469	2.87081	2.39234	0	1.43541	3.82775	0.956938	0	0	35.8852	5.74163	3.82775	0	0	0.478469	31.1005	0	0	0	0	1.43541	5.74163	0	0	0.956938	2.87081	0	100	5.74163	5.33333	66.6667	100	92.8889	3.55556	3.55556	100
Subaqueous delta	SO 63	S.Andò	Grain		32-40	0.162859	3.78159	3.67406	0	2.92683	0.487805	0	1.46341	3.90244	1.95122	0	0	40.9756	8.29268	6.34146	0	0	0	26.3415	0	0.487805	0	0.487805	0.487805	2.43902	0	0	0.97561	1.95122	0.487805	100	3.41463	5.15873	79.1667	80	97.1564	1.4218	1.4218	100
Subaqueous delta	SO 63	S.Andò	Grain		40-62	0.297764	1.97611	1.79728	0	0.995025	0.497512	0	2.48756	1.99005	1.99005	0	0	47.2637	8.95522	8.95522	0	0	0	19.403	0.995025	0	0	0	0.497512	1.99005	0	0	1.49254	0.995025	1.49254	100	1.49254	3.50877	77.7778	40	90.9502	0.904977	8.1448	100
Subaqueous delta	SO 63	S.Andò	Grain		62-80	0.0729217	1.07231	0.469136	0	2.5	0	0	3	2.5	0.5	0	0	46	7	10	0	0	0	20.5	0	1	0	0	0.5	0	0	0	0.5	1.5	4.5	100	2.5	3.62319	90.4762	25	43.75	3.125	53.125	100
Subaqueous delta	SO 63	S.Andò	Grain		80-125	0.0668449	0.520423	0.135762	0	2.94118	0	0	2.94118	0	0	0	0	44.1176	11.7647	23.5294	0	0	0	8.82353	0	0	0	0	2.94118	0	0	0	2.94118	0	0	100	2.94118	2.22222	n.d.	n.d.	26.087	0	73.913	100
Subaqueous delta	SO 63	S.Andò	Grain		125-150	0.0315994	0.706336																																n.d.	n.d.	0	0	100	100
Subaqueous delta	SO 63			31	Phi/2	0.955032	4.5545	4.15992	0.184435	2.21601	1.19441	0	1.90498	3.06346	1.47828	0	0	41.4772	7.56462	6.81676	0	0	0.184435	25.1303	0.346159	0.140133	0	0.0991502	0.91191	3.40129	0	0	1.17278	1.91084	0.80281	100	3.59485	4.42312	71.9328	n.d.	91.3366	2.84046	5.82297	100
																																				0

## Sheet: Table S4 Sand CHI
River		Sample	Class (mm)	% wt	Lab	SiO2	Al2O3	Fe2O3	MgO	CaO	Na2O	K2O	TiO2	P2O5	MnO	LOI	Total	Rb	Cs	Be	Sr	Ba	Sc	Y	La	Ce	Pr	Nd	Sm	Eu	Gd	Tb	Dy	Ho	Er	Tm	Yb	Lu	Th	U	Zr	Hf	V	Nb	Ta	Cr	Mo	W	Co
			/ depth (m)	or GSZ		wt%	wt%	wt%	wt%	wt%	wt%	wt%	wt%	wt%	wt%	wt%		µg/g	µg/g	µg/g	µg/g	µg/g	µg/g	µg/g	µg/g	µg/g	µg/g	µg/g	µg/g	µg/g	µg/g	µg/g	µg/g	µg/g	µg/g	µg/g	µg/g	µg/g	µg/g	µg/g	µg/g	µg/g	µg/g	µg/g	µg/g	µg/g	µg/g	µg/g	µg/g
BEDLOAD SAND
Padma River		BR 529	-11 m	n.d.	CRPG	76.878	10.011	3.075	1.195	2.214	1.827	2.148	0.419	0.102	0.056	1.24	99.165	95.8	4.321	1.815	138.8	342.6	n.d.	21.65	36.77	73.86	8.32	30.14	5.803	1.038	4.673	0.722	4.086	0.747	2.145	0.315	2.151	0.329	15.62	2.374	217.8	5.87	50.56	7.631	0.857	51.75	<0.5	1.488	7.215
Padma River		BR 820	bank	130 mm	CRPG	66.691	10.426	8.32	2.053	5.486	1.341	1.41	1.979	0.493	0.234	1.697	100.13	56.19	2.354	2.163	165.9	209.5	n.d.	139.4	268.4	505.6	55.05	198.4	37.89	4.379	29.5	4.469	25.27	4.807	13.44	2.098	14.22	2.16	116.2	18.6	2000	53.55	125.7	36.14	4.658	192.6	0.57	5.876	10.99
Meghna River		BR 826	bank	120 mm	CRPG	79.8	9.343	2.599	1.035	2.178	1.784	2.069	0.399	0.133	0.046	0.898	100.284	74.22	2.168	1.544	148.6	314.1	n.d.	22.99	27.85	53.95	6.296	23.18	4.79	0.981	4.133	0.661	3.938	0.784	2.261	0.345	2.248	0.343	10.71	1.797	169.8	4.413	47.44	6.729	0.688	56.79	<0.5	0.792	5.579
Meghna River		BGP 36	bank	90 mm	CRPG	74.65	10.34	4.44	1.35	2.5	1.71	1.9	0.75	0.18	0.07	1.78	99.67	97.8071	3.4925	2.0249	185.299	364.16	n.d.	47.6804	68.1805	136.481	15.4679	57.2001	11.3044	1.6979	9.448	1.4753	8.4925	1.7511	4.5368	0.7625	4.6531	0.7208	30.0145	5.0722	623.94	17.2298	88.9991	14.7056	1.5468	92.4239	0.1422	1.7728	9.3064
Meghna estuary		BR 219	-12 m	160 mm	CRPG	65.19	11.25	9.11	2.13	5.51	1.4	1.35	2.25	0.47	0.26	0.72	99.64	51.56	1.953	1.58	210.8	215.6	n.d.	133.9	215.4	415.8	48.69	173.2	32.24	4.465	25.78	4.111	24.14	4.657	13	2	13.91	2.112	89.17	12.83	1345	36.06	151.9	36.71	4.372	224.3	0.533	4.482	12.08
Meghna estuary		BR 446	-11 m	200 mm	CRPG	76.015	10.126	4.575	1.342	2.802	1.795	1.91	0.775	0.15	0.108	0.74	100.338	76.74	2.563	2.096	164.3	307.9	n.d.	44.05	71.37	141.6	15.5	55.37	10.13	1.49	8.29	1.271	7.497	1.452	4.225	0.645	4.38	0.684	28.79	4.279	493.9	12.25	78.52	13.73	1.635	98.99	<0.5	1.452	8.015
Meghna estuary		BR 1051	-10 m	240 mm	CRPG	78.388	9.72	3.657	1.031	2.223	1.836	2.071	0.556	0.103	0.0741	0.846	100.503	80.96	2.423	1.821	169.9	341.4	n.d.	28.83	54.4	115.8	12.6	44.89	8.088	1.328	6.34	0.95	5.239	0.987	2.855	0.426	2.96	0.48	29.05	4.266	411.3	10.9	58.23	9.19	1.464	62.49	0.399	1.399	6.255
Meghna estuary		BR 8230	-17 m	190 mm	CRPG	71.682	10.397	5.631	1.711	3.675	1.729	1.739	1.041	0.282	0.124	1.292	99.302	72.38	2.932	1.936	186.4	384.7	n.d.	62.71	101.1	203	24.1	83.1	15.67	2.291	12.76	1.957	11.31	2.167	6.155	0.921	6.357	0.955	45.96	6.773	625.7	18.32	98.32	17.34	1.97	119.1	<0.1	2.022	10.41
Meghna estuary		BGP 34	bank	n.d.	CRPG	63.23	15.47	6.39	2.59	1.75	1.48	3.02	0.81	0.14	0.09	4.5	99.47	181.217	9.4081	2.8913	139.43	532.427	10.3	36.8567	47.8803	97.715	11.224	42.2754	8.6478	1.6473	6.9836	1.1172	6.6337	1.4082	3.4662	0.5425	3.5402	0.5207	19.5046	3.2767	248.558	6.7045	121.479	16.9758	1.6358	110.653	0.3173	2.9025	17.1816
SUSPENDED-LOAD MUD
Padma River		BR 528	0 m	n.d.	CRPG	57.491	17.059	6.918	2.835	2.778	1.162	3.354	0.798	0.151	0.096	7.214	99.856	170	10.5	2.734	99.52	535.1	n.d.	30.84	41.37	84.49	9.599	35.28	7.061	1.344	5.982	0.942	5.602	1.047	3.029	0.445	3.053	0.469	19.07	3.921	181.6	5.006	101.8	13.44	1.394	98.2	<0.5	3.115	16.43
Padma River		BR 527	- 2.3 m	n.d.	CRPG	60.42	16.023	6.43	2.74	2.758	1.346	3.181	0.774	0.153	0.091	5.973	99.889	166.7	9.896	2.939	113.8	528.1	n.d.	33.25	43.63	87.99	9.911	37.27	7.403	1.434	6.373	1.015	5.96	1.134	3.271	0.492	3.277	0.506	19.45	4.005	215.8	5.92	98.92	13.74	1.482	99.75	0.567	2.949	16.54
Padma River		BR 526	- 5 m	n.d.	CRPG	63.133	15.46	6.128	2.649	2.462	1.541	3.091	0.754	0.156	0.088	4.891	100.353	154.6	8.907	2.762	121.1	503.7	n.d.	30.18	44.19	89.46	10.15	37.22	7.303	1.375	6.171	0.948	5.545	1.036	2.918	0.427	2.885	0.443	19.32	3.88	212.9	5.84	93.07	12.99	1.351	94.82	<0.5	2.863	15.41
Padma River		BR 524	- 7.5 m	n.d.	CRPG	66.068	13.684	5.424	2.313	2.361	1.695	2.764	0.687	0.148	0.08	3.563	98.787	137.7	7.459	3.055	136.4	443.3	n.d.	31.37	37.58	76.74	8.782	32.37	6.357	1.227	5.612	0.897	5.347	1.021	2.957	0.451	3.029	0.472	16.5	3.648	257.5	6.766	83.86	12.17	1.218	85.79	<0.5	2.725	14.07
Padma River		BR 525	- 9.5 m	n.d.	CRPG	67.115	13.43	5.23	2.204	2.552	1.607	2.778	0.646	0.137	0.076	3.908	99.683	141.8	7.851	2.792	127.2	453.7	n.d.	27.57	40.4	82.05	9.251	34.1	6.683	1.244	5.606	0.865	4.971	0.934	2.631	0.389	2.618	0.403	17.13	3.362	234.9	6.223	79.23	11.42	1.194	80.09	<0.5	2.307	13.5
Meghna estuary		BR 448	0 m	12 mm	CRPG	60.277	17.335	6.665	2.766	1.845	1.486	3.391	0.781	0.17	0.098	5.781	100.595	183.7	10.94	3.263	132.7	572.4	n.d.	31.32	41.95	79.49	9.597	35.58	7.016	1.388	5.958	0.933	5.396	1.039	2.971	0.449	2.993	0.458	18.04	3.696	167.3	4.533	119.8	14.05	1.446	123.7	0.723	3.034	19.94
Meghna estuary		BR 441	0 m	9 mm	CRPG	56.566	18.709	7.346	2.805	1.489	1.303	3.546	0.778	0.191	0.105	6.756	99.594	192.8	13	3.535	120.6	610.8	n.d.	31.19	39.85	80.45	9.747	35.73	7.146	1.444	5.982	0.947	5.533	1.08	3.072	0.462	3.109	0.468	19.98	4.483	137.3	3.734	129.9	13.65	1.408	135.6	0.75	3.317	21.34
Meghna estuary		BR 444	- 2 m	13 mm	CRPG	60.141	17.375	6.594	2.644	1.772	1.494	3.297	0.748	0.185	0.094	5.527	99.871	177.6	11.2	3.161	129.5	573.6	n.d.	31.5	41.6	81.28	9.838	36.22	7.113	1.402	6.096	0.961	5.627	1.079	3.089	0.463	3.09	0.468	19.47	3.98	169.1	4.634	116.1	13.7	1.394	122	0.669	2.998	18.85
Meghna estuary		BR 442	- 4 m	15 mm	CRPG	60.838	16.925	6.456	2.666	1.851	1.525	3.258	0.746	0.176	0.096	5.435	99.972	172.1	10.56	3.088	132.5	561.9	n.d.	31.61	40.23	79.64	9.657	35.93	7.109	1.427	6.09	0.957	5.601	1.091	3.12	0.466	3.159	0.47	18.44	3.865	185.1	4.951	114.6	13.36	1.387	116.6	0.748	2.985	18.58
Meghna estuary		BR 440	- 6 m	27 mm	CRPG	64.943	14.497	5.576	2.416	2.47	1.666	2.895	0.715	0.164	0.085	4.041	99.468	148.2	8.398	2.621	142.6	484	n.d.	31.75	37.47	76.48	9.277	34.02	6.869	1.349	5.975	0.952	5.558	1.08	3.067	0.454	3.049	0.464	16.16	3.316	222.6	5.91	96.53	12.78	1.323	98.7	<0.5	2.667	16.17
Meghna estuary		BR 439	- 8 m	49 mm	CRPG	68.106	13.361	5.556	2.26	2.767	1.703	2.742	0.739	0.16	0.082	3.35	100.826	143.4	7.785	2.459	145.5	461.3	n.d.	32.34	41.65	85.81	10.44	38.17	7.478	1.32	6.363	0.986	5.663	1.085	3.049	0.459	3.041	0.466	18.13	3.727	270.6	7.036	87.38	12.57	1.367	87.7	<0.5	3.273	15.22
Meghna estuary		BR 445	- 10 m	43 mm	CRPG	64.227	13.957	5.695	2.461	2.59	1.664	2.876	0.727	0.16	0.085	4.873	99.315	150.8	8.496	2.511	141.8	478.9	n.d.	29.75	38.87	75.61	9.225	34.03	6.716	1.32	5.765	0.909	5.233	1.012	2.919	0.438	2.91	0.443	16.06	3.376	242.9	6.547	95.9	12.96	1.35	95.93	<0.5	2.556	16.64
DELTA SAND & SILT
Pussur distributary		BR 435	- 8 m	60 mm	CRPG	66.067	12.866	5.128	2.213	2.961	1.456	2.767	0.722	0.141	0.09	5.5	99.91	150.6	8.671	2.765	105.2	423.3	n.d.	35.54	49.18	99.81	11.28	41.4	8.207	1.387	6.848	1.066	6.229	1.184	3.402	0.511	3.429	0.529	21.51	4.274	363.5	9.413	77.99	13.39	1.505	73.56	<0.1	2.968	12.91
Pussur distributary		BR 434	- 8 m	< 32 mm	CRPG	59.751	16.197	6.554	2.745	2.292	1.217	3.372	0.829	0.143	0.109	6.73	99.936	186.1	11.84	2.996	95.78	478.2	n.d.	33.97	46	91.49	10.61	39.03	7.741	1.408	6.521	1.031	5.957	1.151	3.288	0.496	3.341	0.518	20.86	4.007	251	6.741	101.3	14.79	1.637	96.22	<0.1	3.56	16.64
Katka beach		BR 809	beach	140 mm	CRPG	75.248	8.462	4.982	1.449	3.191	1.315	1.32	1.168	0.396	0.172	1.399	99.103	60.32	2.636	2.391	91.95	212	n.d.	116.5	160.6	308.4	33.8	123.1	24.27	3.017	20.09	3.235	19.35	3.867	11.19	1.678	11.67	1.786	61.68	11.83	1344	32.95	59.74	23.84	3.055	62.09	<0.1	4.852	6.586
SHELF (sand)
Subaqueous delta		SO 307	- 16 m	180 mm	CRPG	74.22	10.275	4.739	1.468	2.348	1.788	2.079	0.672	0.18	0.0866	1.45	99.3	90.4425	3.6069	2.1338	154.518	292.932	11.86	39.63	58.8635	121.901	13.5126	49.4349	9.6465	1.527	7.836	1.2282	7.2209	1.4876	3.9792	0.6142	4.0614	0.6282	26.9558	4.4562	457.88	13.9893	72.2312	11.094	1.2853	73.1989	<0.1	1.8449	9.2338
Subaqueous delta		SO 316	- 19 m	65 mm	CRPG	73.34	10.748	4.064	1.638	2.451	1.825	2.278	0.65	0.16	0.067	1.83	99.04	102.17	4.5551	2.1701	151.073	324.181	11.06	33.2359	45.8417	96.4	10.7652	39.2468	7.8617	1.34	6.5715	1.0174	6.1084	1.2256	3.298	0.5041	3.2601	0.4927	19.5767	3.4132	361.009	9.4675	66.2492	10.7453	1.1919	64.4601	<0.1	1.9092	9.2478
Subaqueous delta		SO 347	- 126 m	80 mm	CRPG	75.35	7.016	2.895	1.318	4.377	1.159	1.534	0.666	0.07	0.0585	4.93	99.3735	57.5659	1.9942	1.2002	181.311	207.076	7.04	34.0596	44.4828	93.663	10.4739	38.9473	7.7279	1.2656	6.5022	1.0235	6.1439	1.2711	3.4566	0.5426	3.6062	0.568	19.712	3.7938	581.255	17.3595	42.9447	10.1874	1.1361	130.618	<0.1	1.5584	7.6279
SHELF (very coarse silt)
Subaqueous delta		SO 305	- 30 m	50 mm	CRPG	66.55	12.902	6.195	2.447	1.694	1.659	2.928	0.682	0.12	0.0956	3.96	99.23	162.298	10.3498	2.594	128.417	405.002	12.55	23.1576	27.1902	57.4353	6.4886	24.658	4.9894	1.0237	4.373	0.6987	4.2913	0.8728	2.3464	0.3537	2.2754	0.3392	12.1989	2.2817	146.552	4.7505	81.0615	10.8235	1.2343	74.2035	<0.1	3.6231	17.2957
SHELF (fine silt)
Subaqueous delta		SO 311	- 59 m	15 mm	CRPG	56.39	18.083	7.272	3.129	1.576	1.166	3.418	0.785	0.12	0.0877	7.9	99.92	182.691	13.8958	3.3907	129.227	410.263	18.74	26.8984	37.4128	77.9984	8.793	32.8644	6.5528	1.2963	5.4327	0.8435	5.1056	1.036	2.7739	0.4192	2.712	0.4088	19.4244	3.9066	119.374	3.9446	119.967	11.7193	1.3123	114.353	<0.1	4.4681	19.6187
Subaqueous delta		SO 318	- 87 m	13 mm	CRPG	57.29	17.458	7.481	3.098	1.533	1.165	3.518	0.839	0.13	0.1171	7.33	99.95	190.072	13.5021	3.5059	108.26	441.907	18.18	29.2827	37.6146	78.8074	8.8585	33.2889	6.6166	1.3244	5.7159	0.8906	5.4147	1.1112	2.9782	0.4489	2.897	0.4408	19.2496	3.1315	120.599	4.0803	113.374	12.975	1.4774	104.143	<0.1	3.2463	19.8177
Subaqueous delta		SO 350	- 129 m	11 mm	CRPG	58.01	17.88	7.58	2.696	0.568	1.061	3.126	0.92	0.14	0.1168	7.68	99.77	158.808	11.2529	3.0212	105.492	357.841	19.46	31.3552	40.6288	85.7168	9.7291	36.8753	7.4383	1.5566	6.2877	0.9778	5.9533	1.2225	3.2773	0.4931	3.2068	0.4813	19.0554	2.9704	147.357	4.841	129.666	12.8895	1.3762	129.383	<0.1	2.8797	21.1202
BEDLOAD SAND (multiple-window analyses)
Padma River		S 3562	62-80	0.00872904	CRPG	64.396	8.123	11.117	1.935	4.034	1.71	1.656	2.264	0.403	0.2164	n.d.	98.571	64.16	3.314	3.179	188.9	256.4	n.d.	184.2	372.6	749.2	83.14	298	57.02	5.237	44.29	6.207	34.04	6.207	18.3	2.82	20.16	3.437	215.4	38.57	7281	174.1	165.8	42.5	9.258	240.1	0.866	10.9	14.17
Padma River		S 3562	80-125	0.131737	ACME	63.3	11.44	10.5	2.49	5.74	1.36	1.16	2.24	0.45	0.31	0.5	99.49	44.5	1.7	<1	227.8	187	31	141.7	198	387.2	45.58	170.6	29.78	3.75	24.11	4.09	22.96	4.91	14.29	2	14.62	2.25	88.3	12.1	1155.4	32.1	175	40.6	4.3	225.789	0.2	3.4	13.1
Padma River		S 3562	125-180	0.441314	ACME	68.25	11.47	6.72	2.57	5.3	1.67	1.4	1	0.34	0.17	0.9	99.79	51.2	2.1	1	228.7	218.3	23	73.6	96.3	221.9	20.84	74.7	14.9	2.38	12.41	2.16	12.37	2.57	7.17	1.14	7.28	1.09	29.5	3.8	120.2	3.8	128	16.2	1.5	88.9474	0.1	1.3	12.6
Padma River		S 3562	180-250	0.387172	ACME	78.33	9.88	2.9	1.19	2.25	1.89	1.95	0.36	0.08	0.05	1.1	99.98	77.2	3.1	1	170.3	295.6	8	21	28.4	67	6.41	24.8	4.9	0.89	3.83	0.59	3.78	0.71	1.97	0.32	1.84	0.27	9.8	1.4	83.2	2.3	45	6.7	0.6	41.0526	<0.1	1.3	6.5
Padma River		S 3562	250-355	0.0268476	CRPG	76.218	11.453	3.467	1.268	1.123	1.68	3.149	0.396	0.051	0.0493	n.d.	98.854	156.5	8.891	1.783	133.4	459.7	7	11.78	16.2	31.36	3.593	13.16	2.602	0.65	2.269	0.35	2.038	0.395	1.12	0.177	1.203	0.183	7.954	2.704	93.17	2.658	51.58	8.59	0.904	50.83	0.453	11.21	9.459
Padma River		S 3562	355-500	0.000968729	CRPG	48.399	23.067	10.477	3.651	0.643	0.74	6.779	1.285	0.107	0.1466	n.d.	95.294	461.9	33.42	3.578	71.02	957.2	n.d.	15.07	19.84	40.26	4.714	17.5	3.689	0.746	3.302	0.493	2.735	0.503	1.412	0.21	1.436	0.234	9.392	2.624	173.7	4.704	170.5	30.91	3.229	130.5	0.448	178	32.33
Padma River		S 3562	63-2000	162 mm	ACME	72.9	10.73	5.07	1.88	3.64	1.77	1.61	0.85	0.21	0.13	1	99.79	60.5	2.5	3	193.6	244	19	56.6	77.9	157.1	18.24	67.5	11.97	1.82	10.17	1.74	9.87	1.97	5.97	0.89	5.7	0.81	30	4.1	309.2	9.3	98	15.3	1.5	102.632	<0.1	1.9	9.8
[truncated: 30 more columns]
